# Supplementary material for: Targeting Mitochondrial Dysfunction and Oxidative Stress in Activated Microglia using Dendrimer-Based Therapeutics
Source: PubMed Central journal article supplement — Theranostics. 2018 Nov 5;8(20):5529–47. doi: 10.7150/thno.29039 (PMC6276292; doi:10.7150/thno.29039), 2018-11-05
Supplement: thnov08p5529s1.pdf [file thnov08p5529s1.pdf]

## SUPPLEMENTARY INFORMATION

### **Targeting mitochondrial dysfunction and oxidative Stress in activated microglia using dendrimer-based therapeutics**

*Anjali Sharma<sup>1§</sup>, Kevin Liaw<sup>1,2§</sup>, Rishi Sharma<sup>1</sup>, Zhi Zhang<sup>3</sup>, Sujatha Kannan<sup>1,3,4,5</sup>, and Rangaramanujam M. Kannan<sup>\*1,2,4,5</sup>*

<sup>1</sup>Center for Nanomedicine, Department of Ophthalmology, Wilmer Eye Institute Johns Hopkins University School of Medicine, Baltimore, MD 21231, USA;

<sup>2</sup>Department of Chemical and Biomolecular Engineering, Johns Hopkins University, Baltimore MD, 21218, USA;

<sup>3</sup>Department of Anesthesiology and Critical Care Medicine, Johns Hopkins University School of Medicine, Baltimore, MD 21287, USA;

<sup>4</sup>Hugo W. Moser Research Institute at Kennedy Krieger, Inc., Baltimore MD, 21205, USA;

<sup>5</sup>Kennedy Krieger Institute – Johns Hopkins University for Cerebral Palsy Research Excellence, Baltimore, MD 21218, USA;

§These authors contributed equally

\*Corresponding author:

Rangaramanujam M. Kannan, Arnall Patz Distinguished Professor of Ophthalmology, Center for Nanomedicine at the Wilmer Eye Institute, 400 North Broadway, Baltimore, Maryland 21231, USA

Tel.: +1 443-287-8634; Fax: +1 443-287-8635; e-mail: [krangar1@jhmi.edu](mailto:krangar1@jhmi.edu)

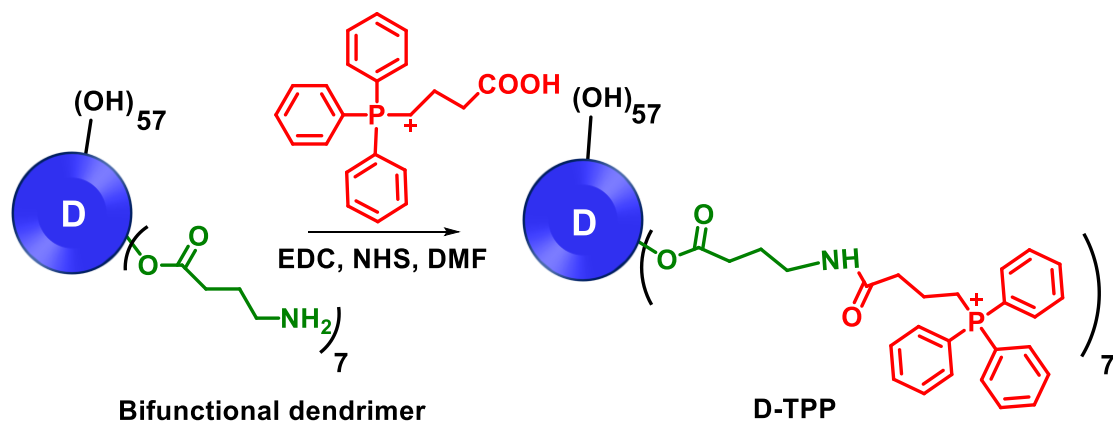

**Scheme S1.** Synthesis of D-TPP

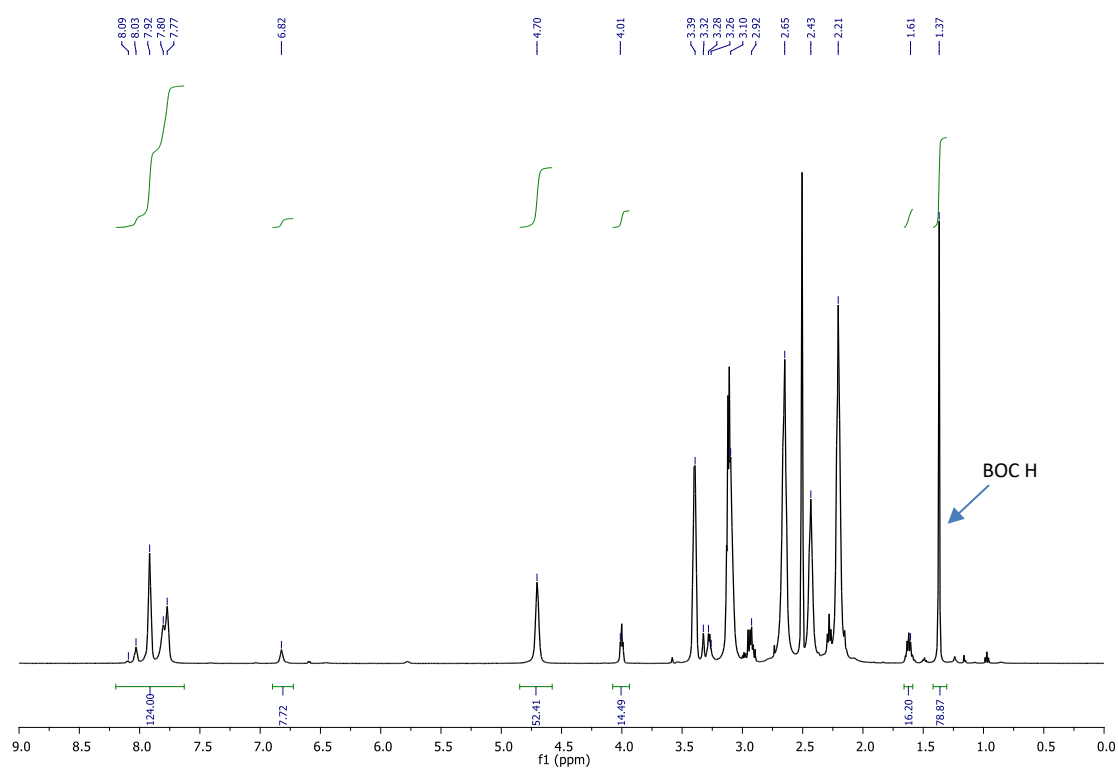

**Figure S1.**  $^1\text{H}$  NMR spectrum of BOC protected bifunctional dendrimer **2a** in DMSO (500 MHz).

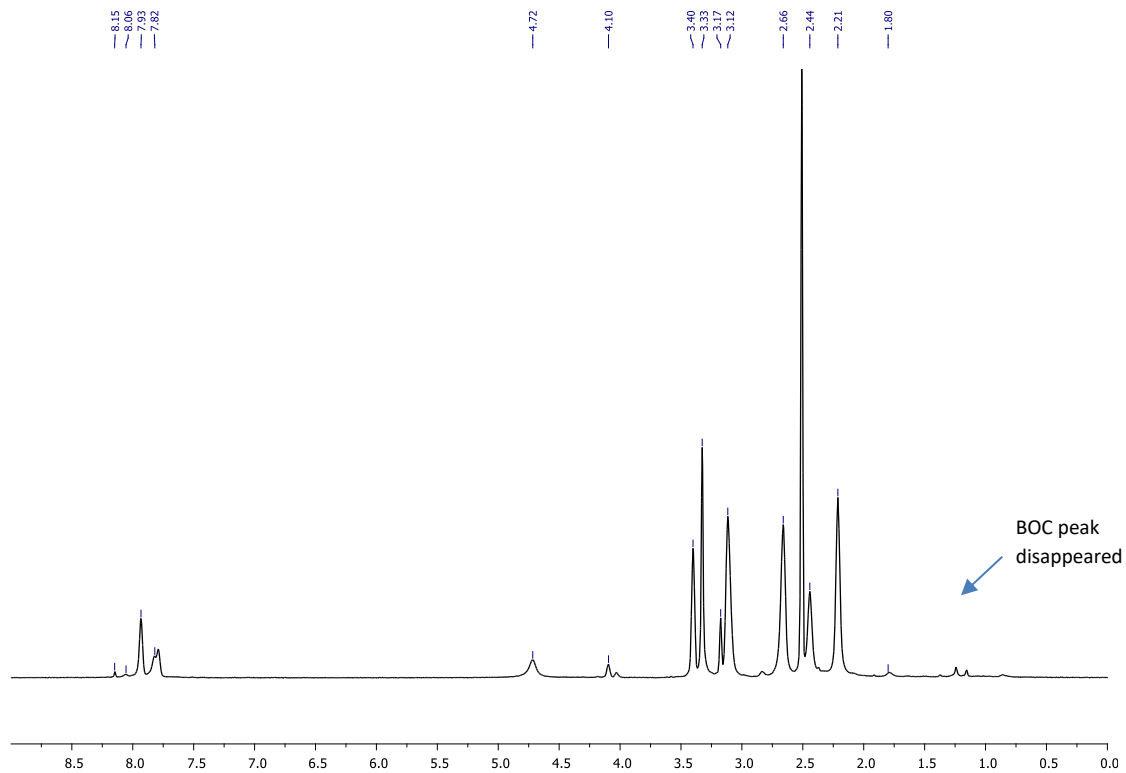

**Figure S2.**  $^1\text{H}$  NMR spectrum of bifunctional dendrimer **3a** in DMSO (500 MHz).

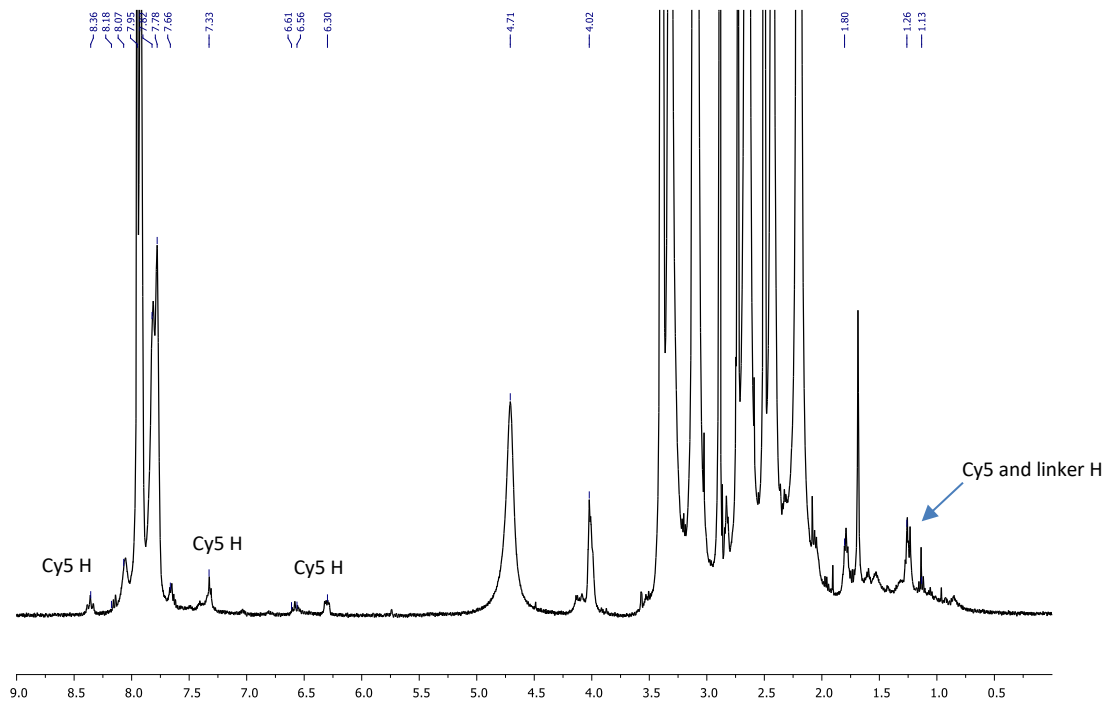

**Figure S3.**  $^1\text{H}$  NMR spectrum of compound **4** in DMSO (500 MHz).

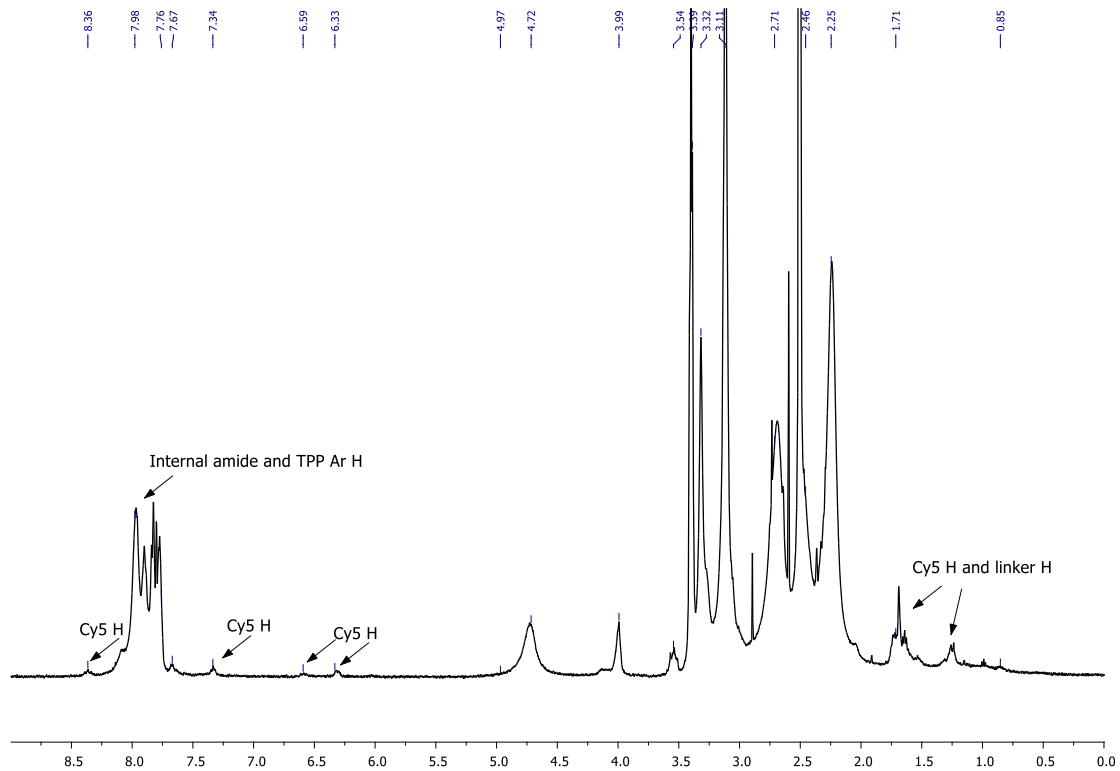

**Figure S4.**  $^1\text{H}$  NMR spectrum of compound **5** in DMSO (500 MHz).

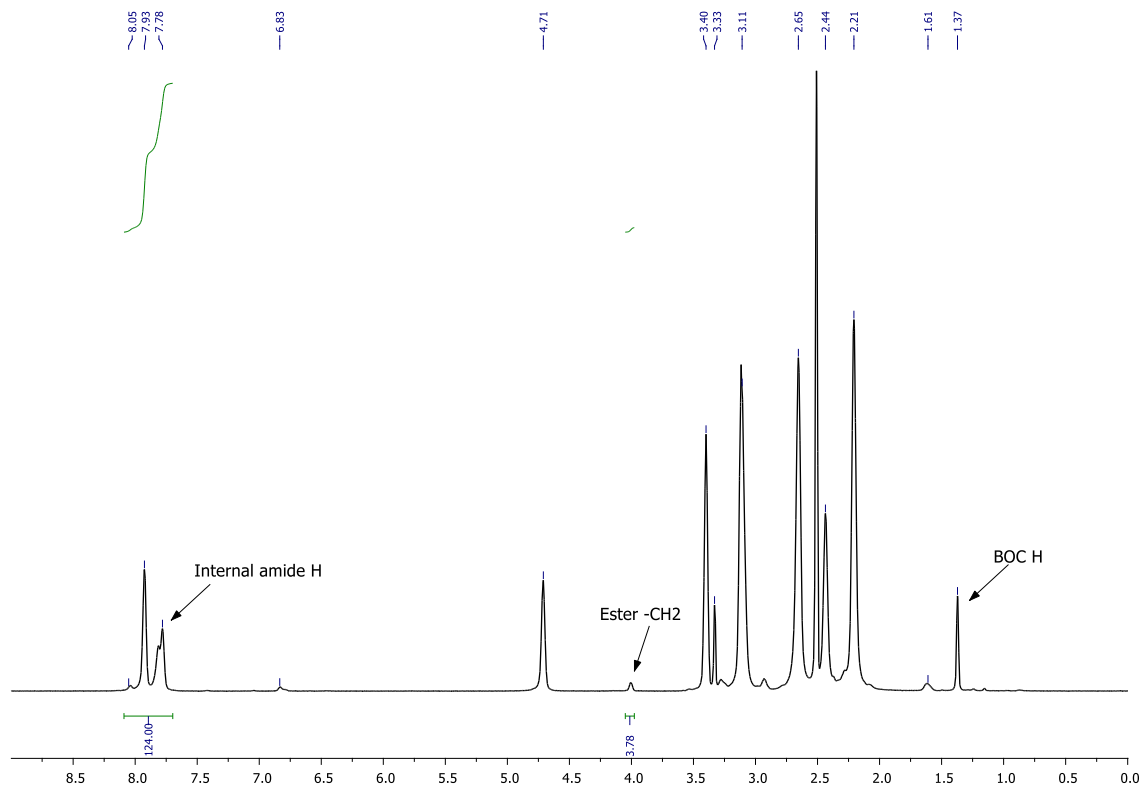

**Figure S5.**  $^1\text{H}$  NMR spectrum of compound **2b** in DMSO (500 MHz).

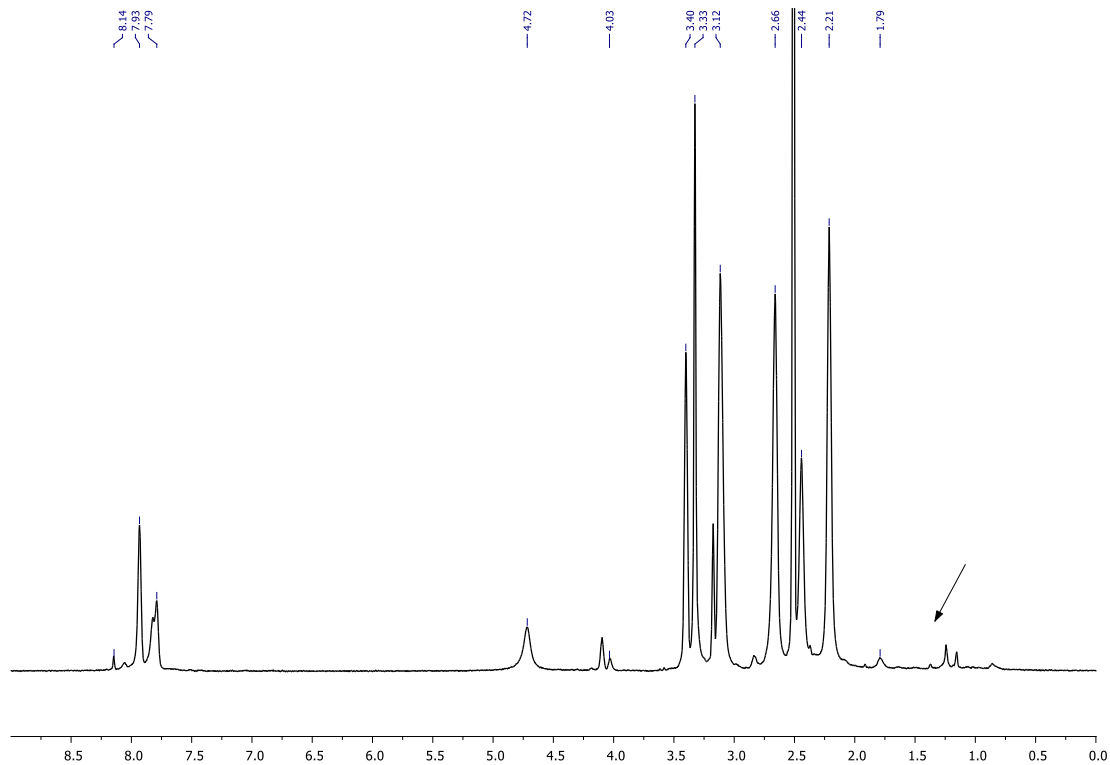

**Figure S6.**  $^1\text{H}$  NMR spectrum of compound **3b** in DMSO (500 MHz).

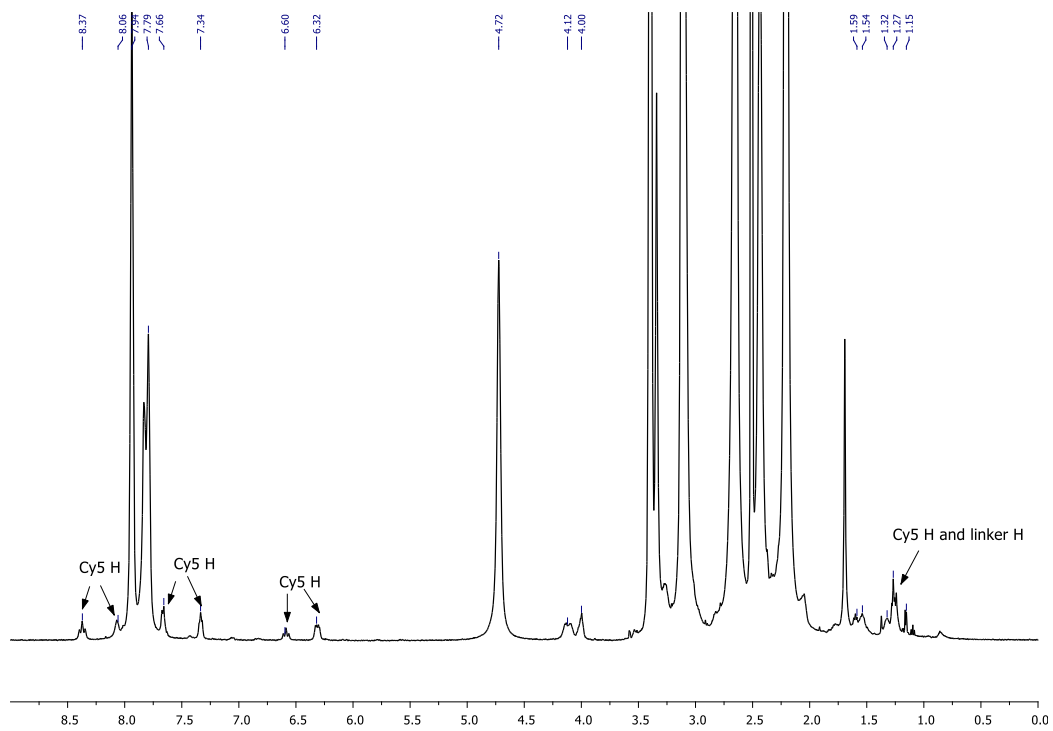

**Figure S7.**  $^1\text{H}$  NMR spectrum of compound **6 (D-Cy5)** in DMSO (500 MHz).

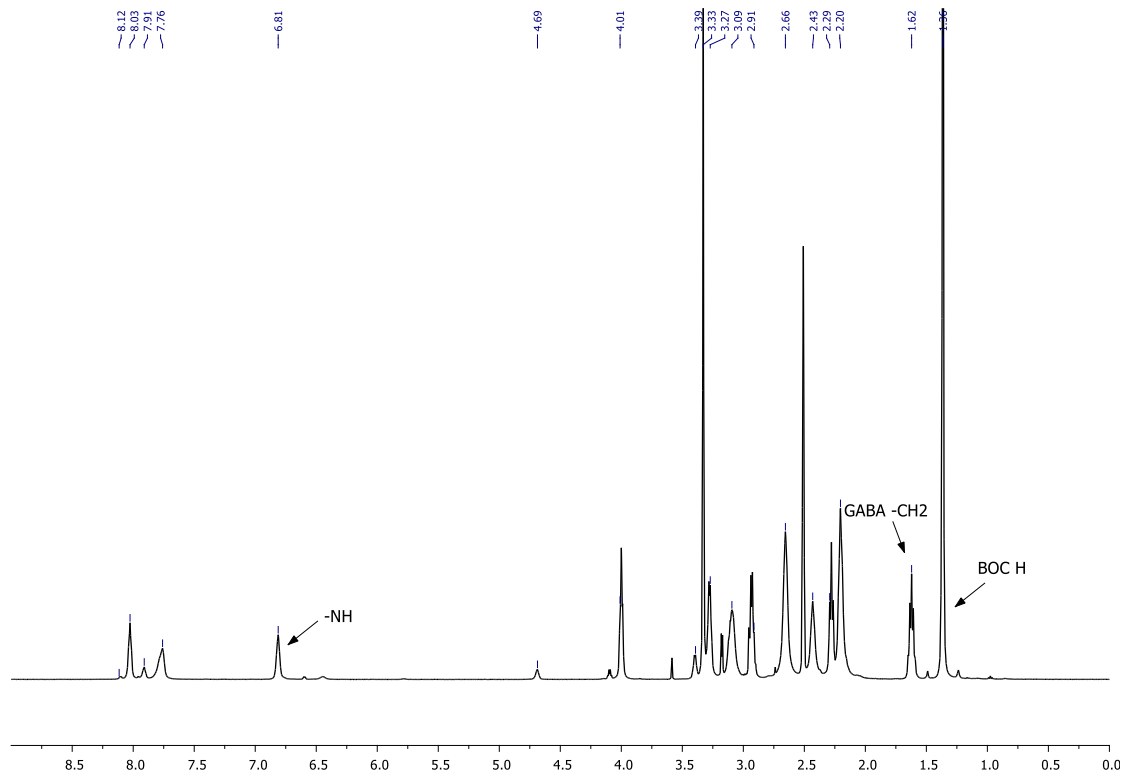

**Figure S8.** <sup>1</sup>H NMR spectrum of compound **2c** in DMSO (500 MHz).

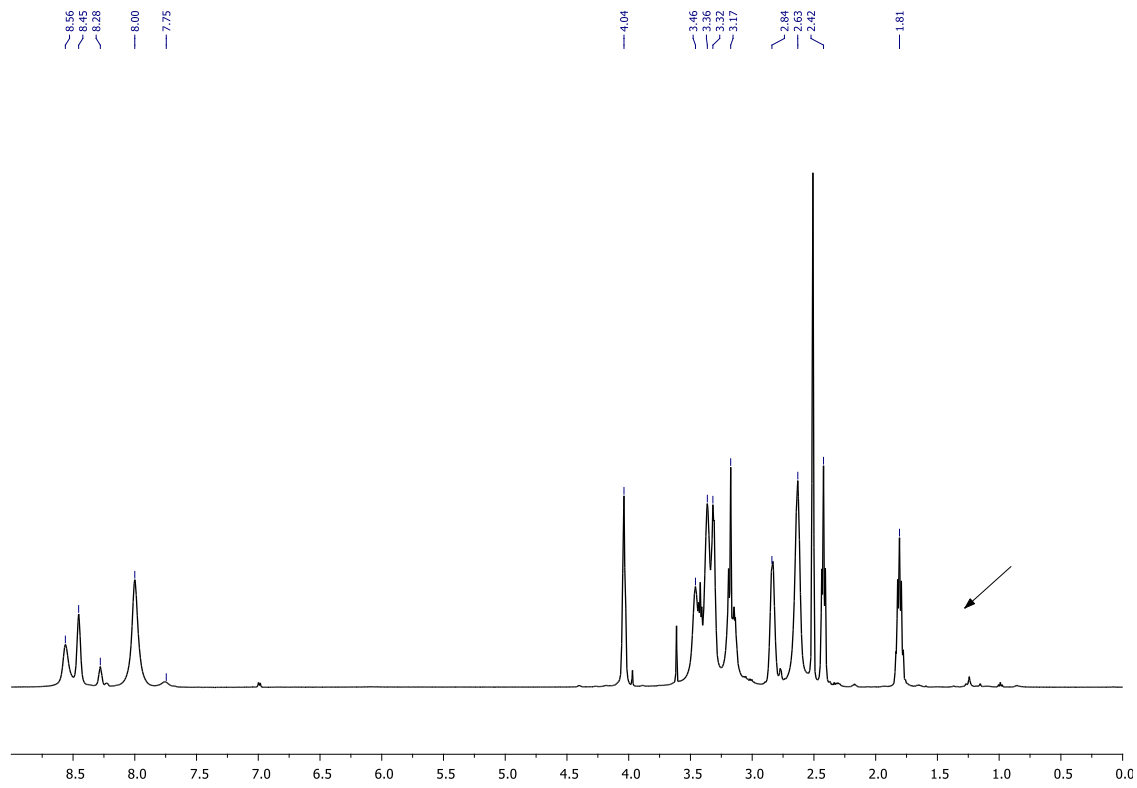

**Figure S9.** <sup>1</sup>H NMR spectrum of compound **3c** in DMSO (500 MHz).

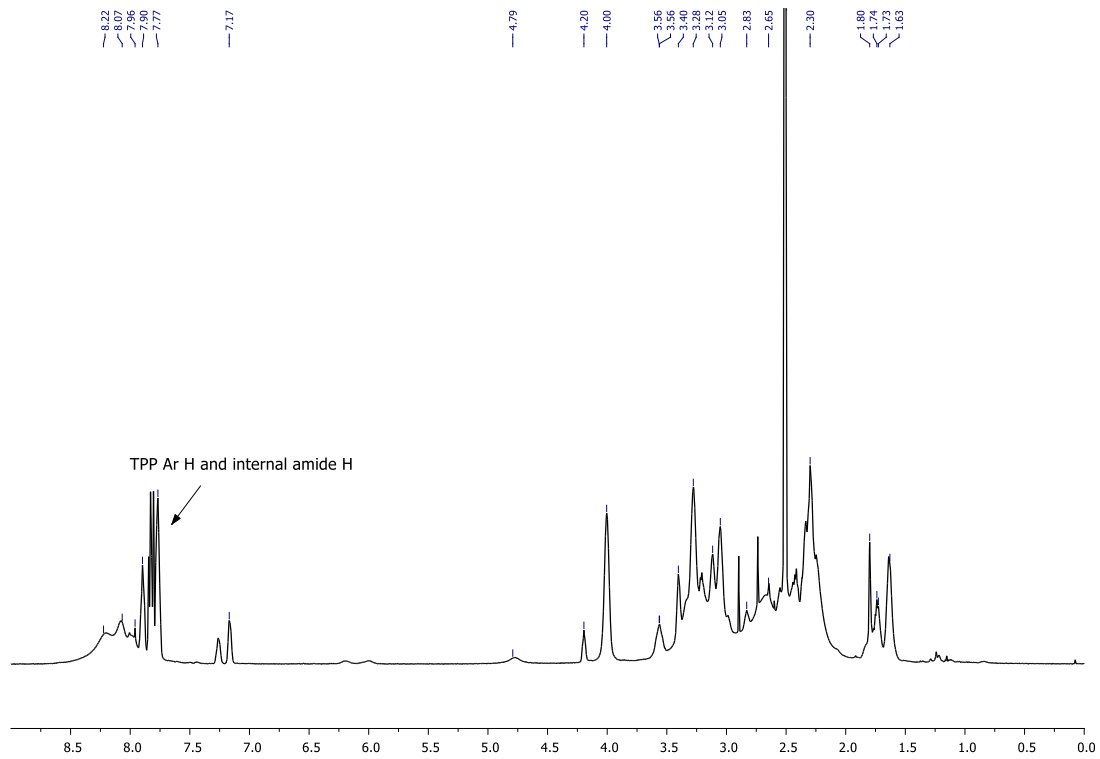

**Figure S10.**  $^1\text{H}$  NMR spectrum of compound **7** in DMSO (500 MHz).

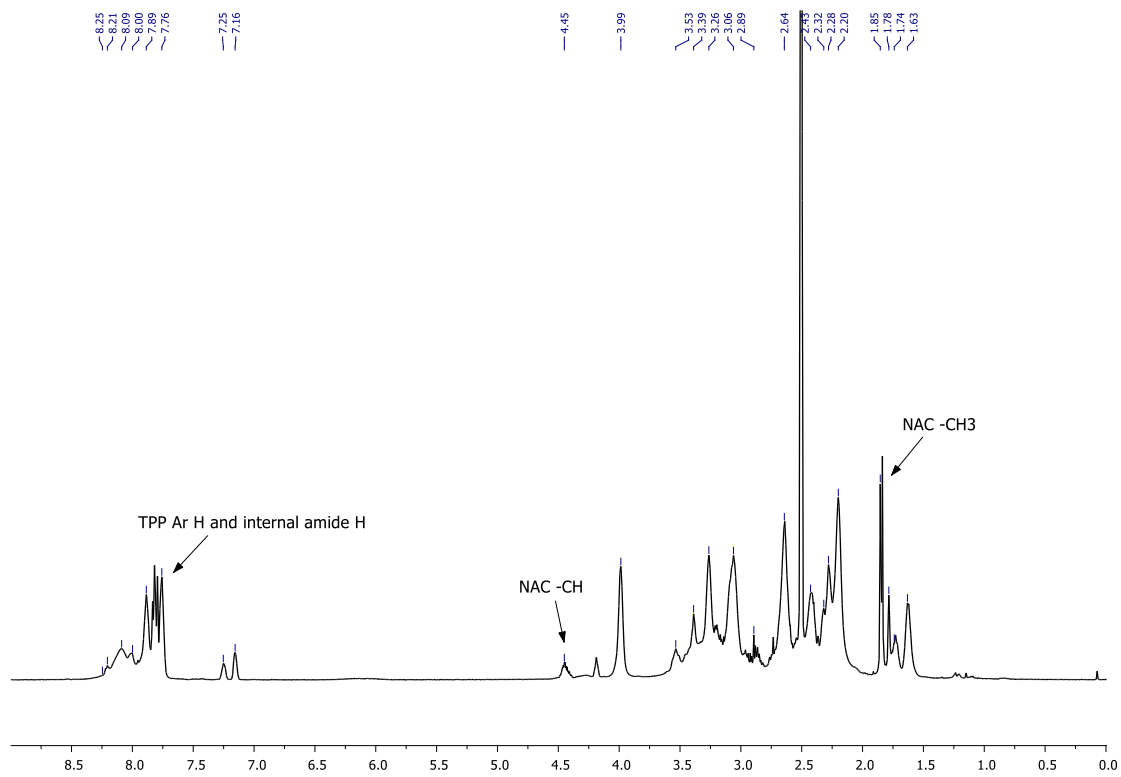

**Figure S11.**  $^1\text{H}$  NMR spectrum of compound **9** in DMSO (500 MHz).

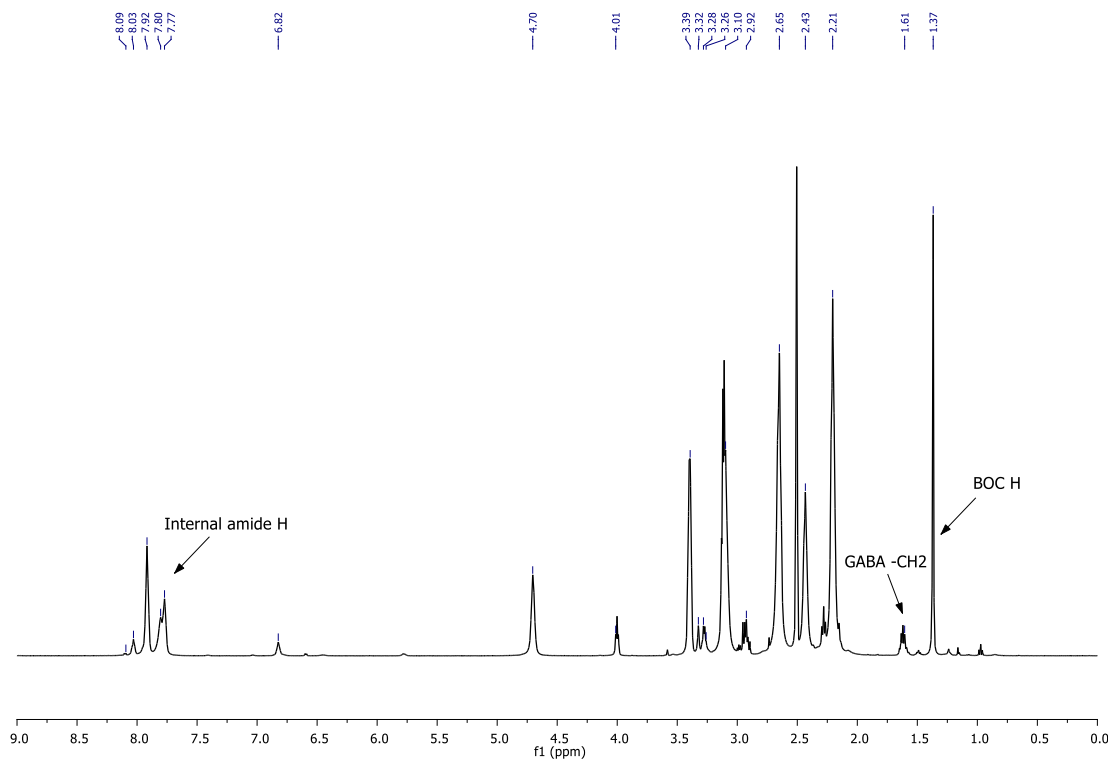

**Figure S12.**  $^1\text{H}$  NMR spectrum of compound **2d** in DMSO (500 MHz).

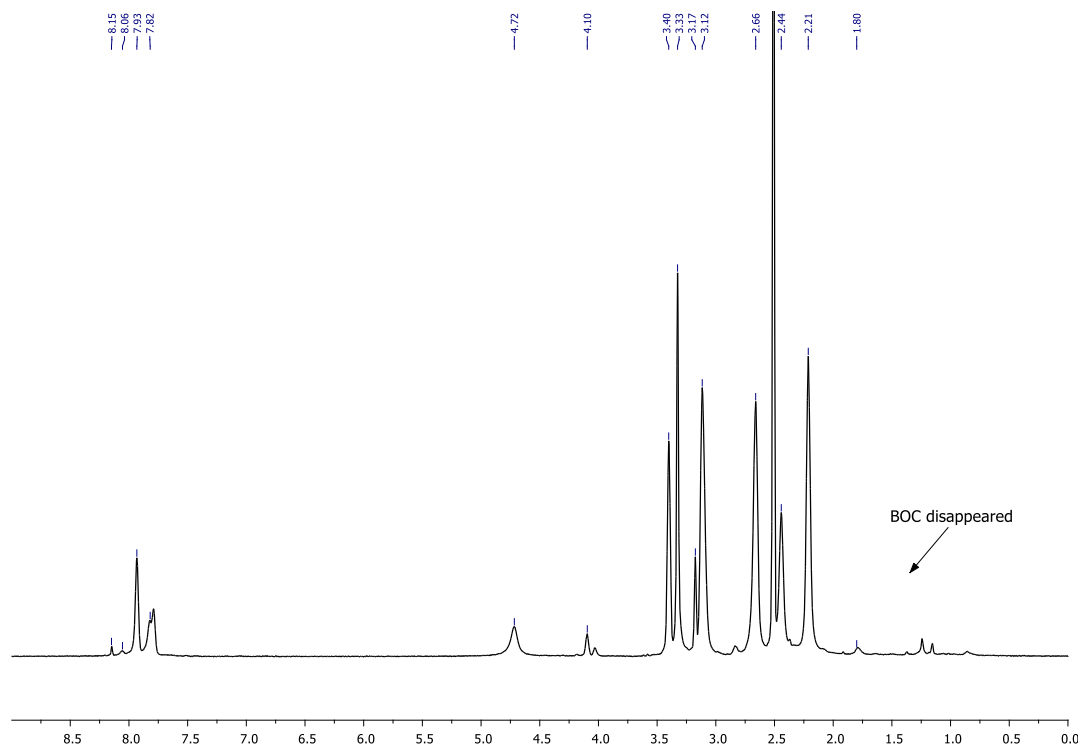

**Figure S13.**  $^1\text{H}$  NMR spectrum of compound **3d** in DMSO (500 MHz).



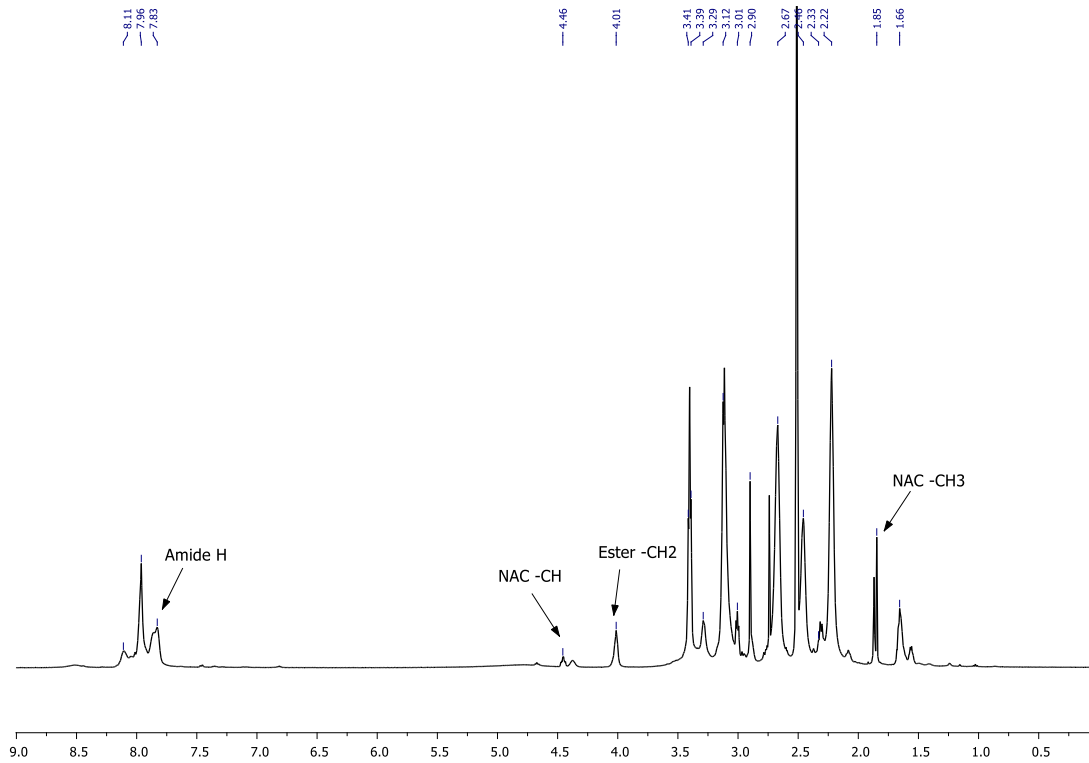

**Figure S14.**  $^1\text{H}$  NMR spectrum of compound **10** (D-NAC) in DMSO (500 MHz).

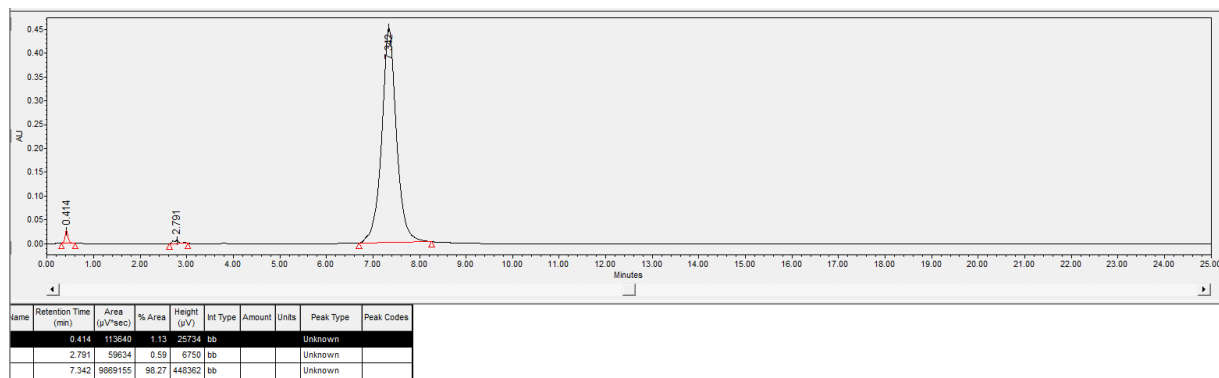

**Figure S15.** HPLC chromatogram of compound **5** (TPP-D-Cy5) at 650nm.

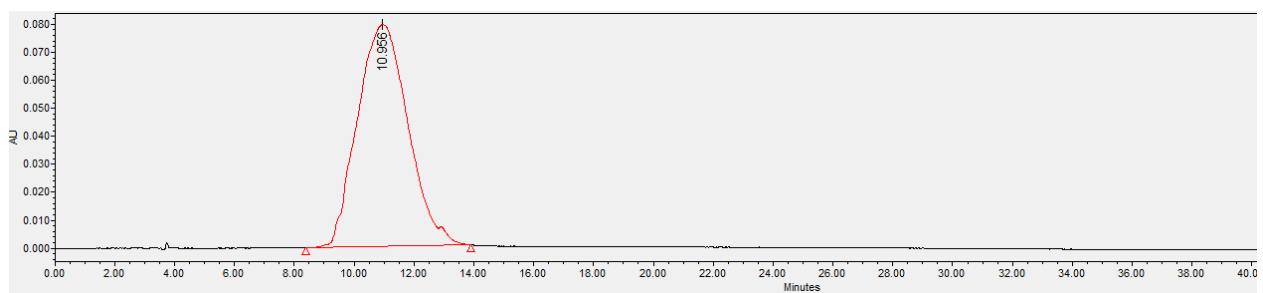

**Figure S16.** HPLC chromatogram of compound **6** (D-Cy5) at 650nm.

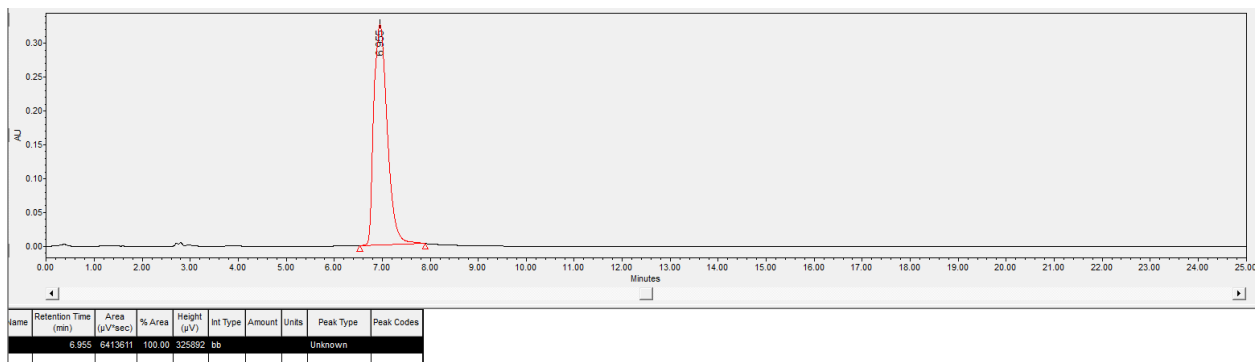

**Figure S17.** HPLC chromatogram of compound **9 (TPP-D-NAC)** at 210nm.

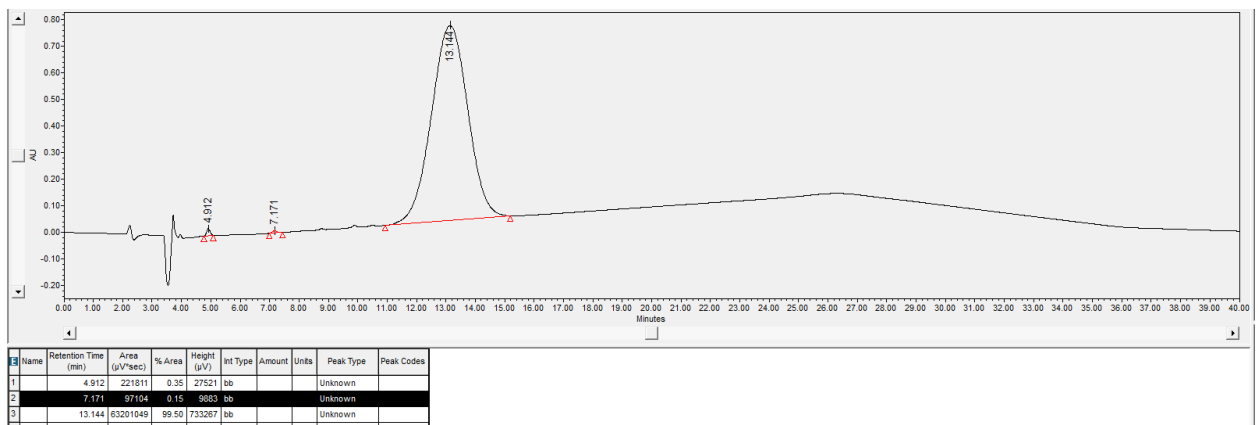

**Figure S18.** HPLC chromatogram of compound **10 (D-NAC)** at 210nm.

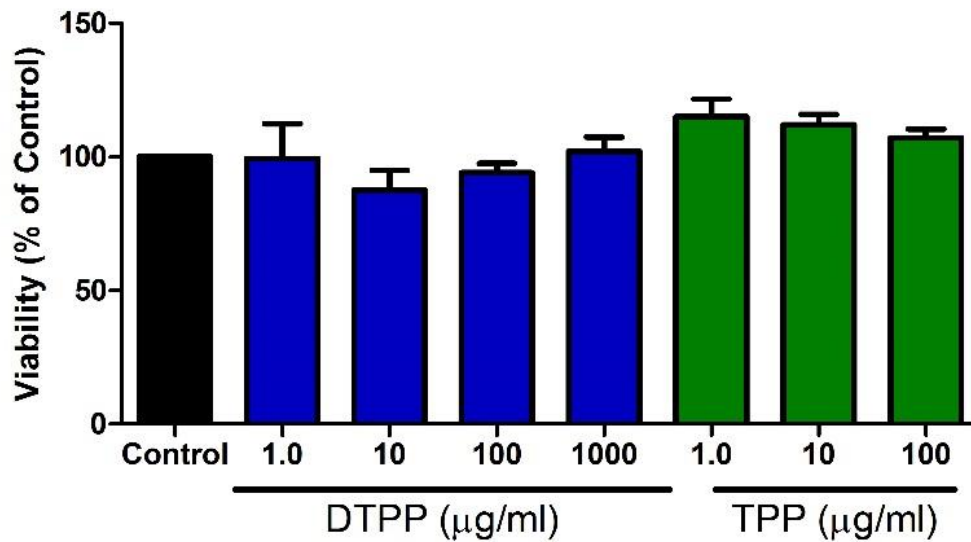

**Figure S19.** Cell viability assessment of TPP-conjugated dendrimer. Free TPP and TPP-conjugated dendrimer do not exhibit cytotoxicity at and above the range of concentrations used in *in vitro* experiments.

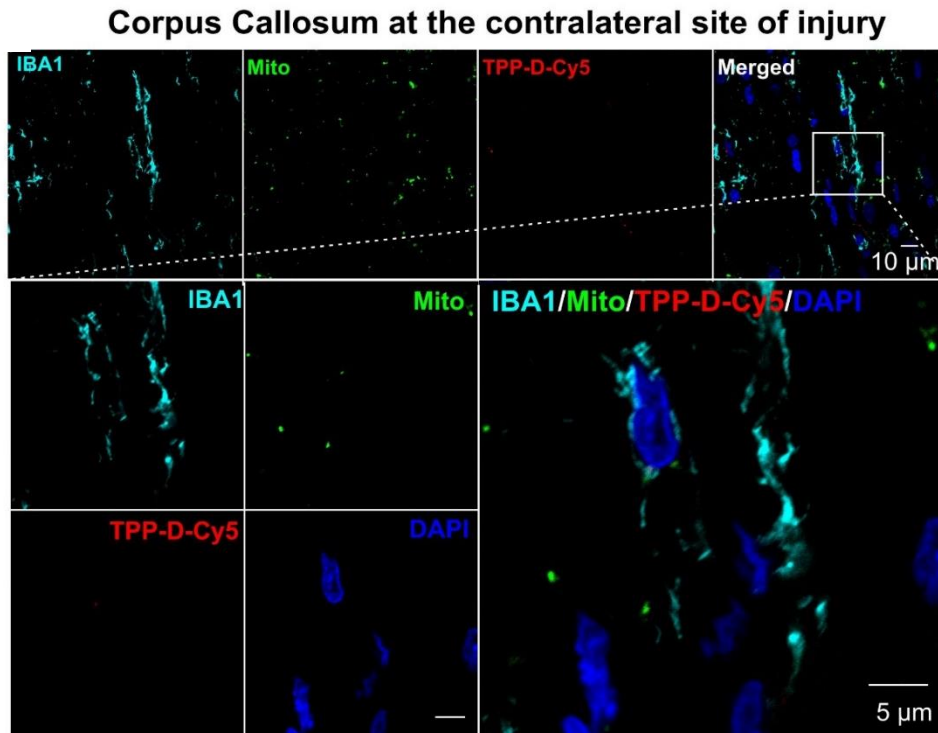

**Figure S20.** Confocal images showing that at the corpus callosum of the contralateral site of injury, there was no significant TPP-D-Cy5 uptake in the resting microglia in pediatric TBI rabbit kits.
